# Supplementary material for: In vivo acute toxicity of detoxified Fuzi (lateral root of Aconitum carmichaeli) after a traditional detoxification process
Source: PubMed Central journal article supplement (PMC6295630; doi:10.17179/excli2018-1607), 2018-08-31
Supplement: EXCLI-17-889-s-001.pdf [file EXCLI-17-889-s-001.pdf]

**Supplementary material to:**

***IN VIVO* ACUTE TOXICITY OF DETOXIFIED *FUZI*  
(LATERAL ROOT OF *ACONITUM CARMICHAELI*) AFTER  
A TRADITIONAL DETOXIFICATION PROCESS**

Wan Sun<sup>1,2†</sup>, Bo Yan<sup>1,2†</sup>, Rongrong Wang<sup>1,2†</sup>, Fucun Liu<sup>3</sup>, Zhengyan Hu<sup>4</sup>, Li Zhou<sup>1</sup>, Li Yan<sup>1,2</sup>, Kang Zhou<sup>1</sup>, Jiawei Huang<sup>2\*</sup>, Peijian Tong<sup>1\*</sup>, Letian Shan<sup>1\*</sup>, Thomas Efferth<sup>5</sup>

<sup>1</sup> The First Affiliated Hospital, Zhejiang Chinese Medical University, Hangzhou, China

<sup>2</sup> College of Pharmaceutical Science, Zhejiang Chinese Medical University, Hangzhou, China

<sup>3</sup> Changzheng Hospital, Second Military Medical University, Shanghai, China

<sup>4</sup> Zhejiang Provincial Center for Disease Control and Prevention, Hangzhou, China

<sup>5</sup> Department of Pharmaceutical Biology, Institute of Pharmacy and Biochemistry, Johannes Gutenberg University, Mainz, Germany

\* Corresponding authors: Jiawei Huang: [hjw3657@163.com](mailto:hjw3657@163.com),  
Peijian Tong: [tongpeijian@163.com](mailto:tongpeijian@163.com), Letian Shan: [letian.shan@zcmu.edu.cn](mailto:letian.shan@zcmu.edu.cn)

† These authors contributed equally to this work.

<http://dx.doi.org/10.17179/excli2018-1607>

This is an Open Access article distributed under the terms of the Creative Commons Attribution License (<http://creativecommons.org/licenses/by/4.0/>).

**Supplementary Video 1:**

Zebrafish larval in normal group with no phenotype of arrhythmia

**Supplementary Video 2:**

Zebrafish larval in FZ-120 group (865 µg/ml) with obvious phenotype of arrhythmia  
(6 s on the video)

**Supplementary Video 3:**

Zebrafish larval in FZ-120 group (896 µg/ml) with obvious phenotype of arrhythmia  
(5 s on the video)
